# Supplementary material for: Aerosol and cloud data processing and optical property retrieval algorithms for the spaceborne ACDL/DQ-1
Source: Copernicus journal article supplement (doi:10.5194/amt-17-1879-2024), 2024-04-03
Supplement: Supplementary file 1 [file amt-17-1879-2024-supplement.zip]

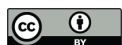

*Supplement of*

## **Aerosol and cloud data processing and optical property retrieval algorithms for the spaceborne ACDL/DQ-1**

**Guangyao Dai et al.**

*Correspondence to:* Songhua Wu (wush@ouc.edu.cn)

- amt-17-1879-2024-supplement-title-page.pdf
- 20220627-ACDL-A-Data
  - 20220627\_001056\_0000008983\_0\_Aerosol\_Baseline03.h5
  - 20220627\_001061\_0000009062\_0\_Aerosol\_Baseline03.h5

The copyright of individual parts of the supplement might differ from the article licence.
